# Supplementary material for: Non-equivalent Mn4+ doping in mixed-anion host of K3Na(MoO2F4)2·H2O achieving short fluorescence lifetime and intense zero phonon line
Source: Royal Society of Chemistry journal article supplement (doi:10.1039/d4tc00218k), 2024-01-01
Supplement: d4tc00218k1.pdf [file d4tc00218k1.pdf]

## SUPPORTING INFORMATION

### **Non-equivalent Mn<sup>4+</sup> doping in mixed-anion host of K<sub>3</sub>Na(MoO<sub>2</sub>F<sub>4</sub>)<sub>2</sub>·H<sub>2</sub>O achieving short fluorescence lifetime and intense zero phonon line**

Qiao Qu <sup>a</sup>, Haiyan Zhang <sup>b</sup>, Haipeng Ji <sup>a,\*</sup>

<sup>a</sup> *School of Materials Science and Engineering, Zhengzhou University, Zhengzhou 450001, China*

<sup>b</sup> *School of Electromechanics and Information, Chengdu Agricultural College, 611130 Chengdu, China*

\*Corresponding author. Haipeng Ji, E-mail: jihp@zzu.edu.cn

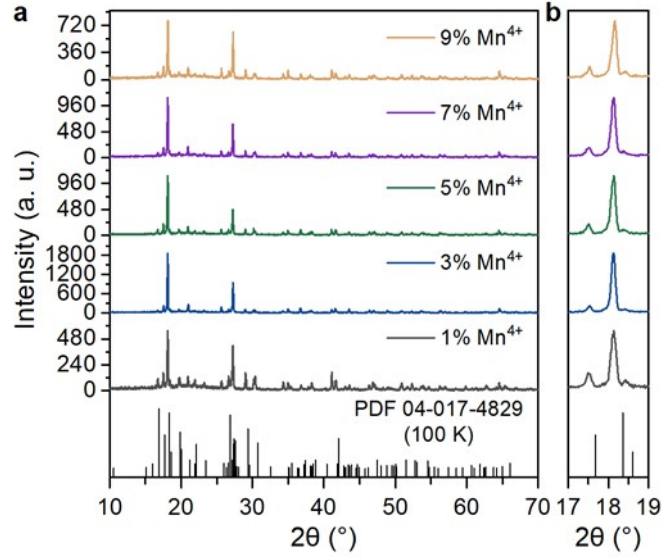

**Fig. S1** XRD patterns in the 2θ range of 10°–70° (a), and 2θ range of 17°–19° (b) of  $\text{K}_3\text{Na}(\text{MoO}_2\text{F}_4)_2 \cdot \text{H}_2\text{O} : x\text{Mn}^{4+}$  ( $x = 1\%$ , 3%, 5%, 7%, 9%;  $x$  is the nominal atomic ratio of Mn<sup>4+</sup> designed for substituting Mo<sup>6+</sup>) phosphors.

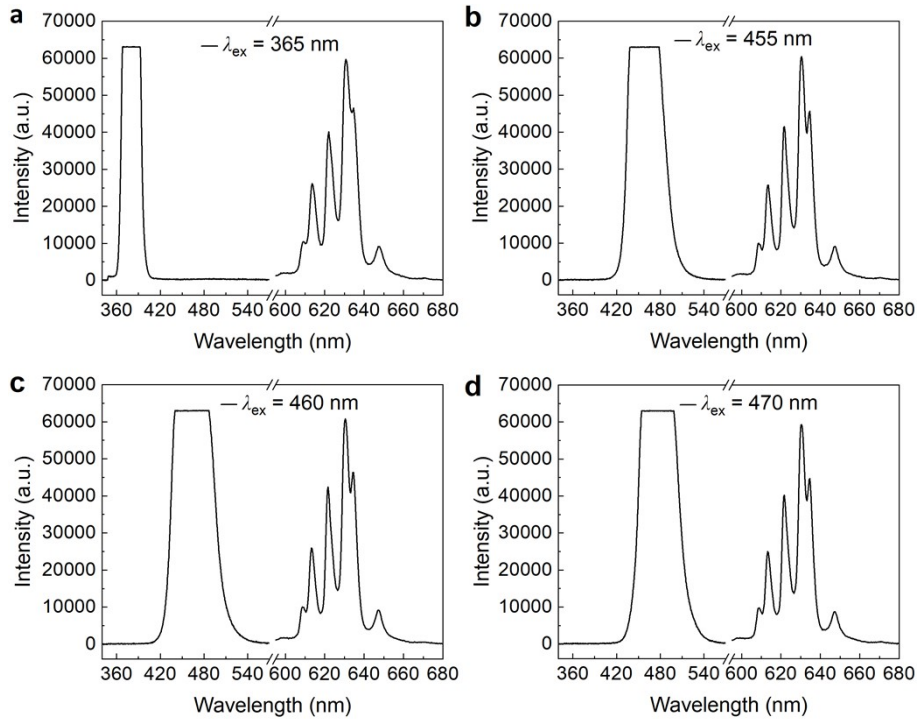

**Fig. S2** PL spectra of  $\text{K}_3\text{Na}(\text{MoO}_2\text{F}_4)_2 \cdot \text{H}_2\text{O} : 3\%\text{Mn}^{4+}$  under different excitation wavelengths.

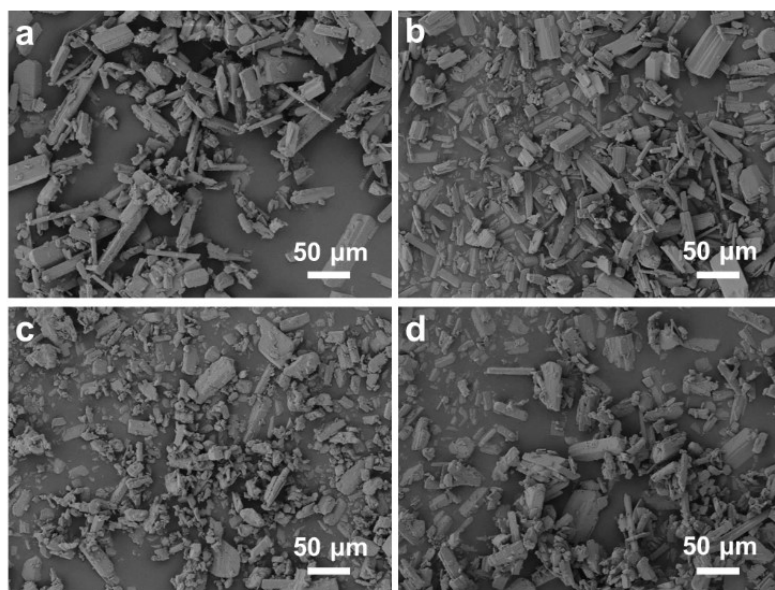

**Fig. S3** SEM images of  $\text{K}_3\text{Na}(\text{MoO}_2\text{F}_4)_2 \cdot \text{H}_2\text{O} : 3\% \text{Mn}^{4+}$  prepared with different HF dosage (a, 1.0 mL; b, 1.5 mL; c, 2.0 mL HF; d, 2.5 mL HF).

**Table S1.** Crystallographic parameters and refinement parameters for  $\text{K}_3\text{Na}(\text{MoO}_2\text{F}_4)_2 \cdot \text{H}_2\text{O} : 3\% \text{Mn}^{4+}$  prepared with 1 mL HF

| Items                    | Parameters  |
|--------------------------|-------------|
| Space group              | $C2/m$      |
| Crystal structure        | Monoclinic  |
| $a$ (Å)                  | 20.4882(8)  |
| $b$ (Å)                  | 5.9242(3)   |
| $c$ (Å)                  | 11.8238(3)  |
| $\alpha = \beta$ (°)     | 90          |
| $\gamma$ (°)             | 124.2527    |
| Volume (Å <sup>3</sup> ) | 1186.238(4) |
| $R_{\text{wp}}$ (%)      | 8.74        |
| $R_{\text{p}}$ (%)       | 7.36        |
| $\chi^2$                 | 1.82        |
